# Supplementary material for: Distinct and common features of numerical and structural chromosomal instability across different cancer types
Source: bioRxiv or medRxiv preprint supplement (doi:10.1101/2021.10.15.464567), 2022-04-14
Supplement: Supplementary file [file media-1.pdf]

## Supplemental Tables and Figures

Xiaoxiao Zhang<sup>1,2</sup> and Maik Kschischo<sup>1\*</sup>

<sup>1\*</sup>Department of Mathematics and Technology, University of Applied Sciences Koblenz, Joseph-Rovan-Allee 2, 53424 Remagen, Germany.

<sup>2</sup>Department of Informatics, Technical University of Munich, Munich, 81675, Germany.

\*Corresponding author(s). E-mail(s):

[kschischo@rheinahrcampus.de](mailto:kschischo@rheinahrcampus.de);

Contributing authors: [zhang@hs-koblenz.de](mailto:zhang@hs-koblenz.de);

**Supplementary tables for the survival analysis**

**Table 1 Association between WCIN and overall survival across cancer types**

| cohort | sample_number | pvalue | low_surv5 <sup>a</sup> | high_surv5 <sup>b</sup> | low_surv5_n <sup>c</sup> | high_surv5_n <sup>d</sup> |
|--------|---------------|--------|------------------------|-------------------------|--------------------------|---------------------------|
| LGG    | 509           | 0.00   | 0.76                   | 0.48                    | 38.00                    | 27.00                     |
| UCEC   | 518           | 0.00   | 0.88                   | 0.65                    | 65.00                    | 42.00                     |
| LIHC   | 366           | 0.00   | 0.54                   | 0.44                    | 24.00                    | 17.00                     |
| BRCA   | 1066          | 0.00   | 0.87                   | 0.77                    | 133.00                   | 116.00                    |
| OV     | 558           | 0.01   | 0.40                   | 0.29                    | 62.00                    | 54.00                     |
| SARC   | 252           | 0.03   | 0.59                   | 0.50                    | 30.00                    | 26.00                     |
| TGCT   | 133           | 0.04   | 1.00                   | 0.95                    | 28.00                    | 23.00                     |
| HNSC   | 516           | 0.05   | 0.56                   | 0.40                    | 24.00                    | 28.00                     |
| UVM*   | 80            | 0.07   | 0.94                   | 0.92                    | 33.00                    | 31.00                     |
| THCA   | 497           | 0.09   | 0.97                   | 0.89                    | 51.00                    | 45.00                     |
| THYM   | 122           | 0.09   | 0.98                   | 0.88                    | 18.00                    | 15.00                     |
| KIRP   | 282           | 0.10   | 0.84                   | 0.68                    | 34.00                    | 19.00                     |
| PCPG   | 161           | 0.14   | 0.98                   | 0.95                    | 16.00                    | 12.00                     |
| GBM    | 571           | 0.17   | 0.07                   | 0.06                    | 10.00                    | 9.00                      |
| ACC    | 89            | 0.18   | 0.69                   | 0.56                    | 14.00                    | 14.00                     |
| DLBC   | 48            | 0.19   | 0.72                   | 0.90                    | 6.00                     | 3.00                      |
| STAD   | 433           | 0.25   | 0.41                   | 0.35                    | 10.00                    | 8.00                      |
| CESC   | 294           | 0.27   | 0.73                   | 0.60                    | 25.00                    | 16.00                     |
| LAML   | 179           | 0.34   | 0.24                   | 0.17                    | 6.00                     | 3.00                      |
| PRAD   | 489           | 0.41   | 0.99                   | 0.97                    | 35.00                    | 49.00                     |
| KIRC   | 506           | 0.44   | 0.62                   | 0.63                    | 66.00                    | 81.00                     |
| CHOL*  | 36            | 0.45   | 0.71                   | 0.88                    | 12.00                    | 15.00                     |
| READ*  | 154           | 0.48   | 0.94                   | 0.96                    | 51.00                    | 64.00                     |
| ESCA*  | 182           | 0.49   | 0.82                   | 0.70                    | 65.00                    | 50.00                     |
| MESO*  | 86            | 0.59   | 0.65                   | 0.71                    | 28.00                    | 28.00                     |
| LUAD   | 491           | 0.63   | 0.42                   | 0.40                    | 28.00                    | 25.00                     |
| COAD   | 425           | 0.75   | 0.66                   | 0.54                    | 25.00                    | 15.00                     |
| KICH   | 65            | 0.77   | 0.86                   | 0.85                    | 17.00                    | 20.00                     |
| SKCM*  | 104           | 0.77   | 0.84                   | 0.91                    | 33.00                    | 37.00                     |
| PAAD   | 183           | 0.85   | 0.16                   | 0.33                    | 3.00                     | 5.00                      |
| BLCA   | 405           | 0.87   | 0.42                   | 0.42                    | 24.00                    | 23.00                     |
| UCS*   | 56            | 0.88   | 0.79                   | 0.81                    | 22.00                    | 20.00                     |
| LUSC   | 481           | 0.96   | 0.50                   | 0.45                    | 38.00                    | 42.00                     |

<sup>a</sup>5-year overall survival probability in low WCIN group.

<sup>b</sup>5-year overall survival probability in high WCIN group.

<sup>c</sup>number of samples at risk in low WCIN group at 5th year.

<sup>d</sup>number of samples at risk in high WCIN group at 5th year.

\*1-year overall survival statistics was reported in these cancer types due to short survival.

**Table 2 Association between SCIN and overall survival across cancer types**

| cohort | sample_number | pvalue | low_surv5 <sup>a</sup> | high_surv5 <sup>b</sup> | low_surv5_n <sup>c</sup> | high_surv5_n <sup>d</sup> |
|--------|---------------|--------|------------------------|-------------------------|--------------------------|---------------------------|
| UCEC   | 518           | 0.00   | 0.90                   | 0.60                    | 69.00                    | 38.00                     |
| ACC    | 89            | 0.00   | 0.81                   | 0.39                    | 21.00                    | 7.00                      |
| THCA   | 497           | 0.00   | 0.96                   | 0.72                    | 86.00                    | 10.00                     |
| SARC   | 252           | 0.00   | 0.62                   | 0.47                    | 31.00                    | 25.00                     |
| KIRP   | 282           | 0.00   | 0.86                   | 0.65                    | 30.00                    | 23.00                     |
| THYM   | 122           | 0.01   | 0.98                   | 0.76                    | 29.00                    | 4.00                      |
| PCPG   | 161           | 0.01   | 1.00                   | 0.92                    | 15.00                    | 13.00                     |
| LGG    | 509           | 0.01   | 0.73                   | 0.52                    | 32.00                    | 33.00                     |
| KICH   | 65            | 0.02   | 0.97                   | 0.70                    | 23.00                    | 14.00                     |
| COAD   | 425           | 0.02   | 0.71                   | 0.52                    | 23.00                    | 17.00                     |
| OV     | 558           | 0.04   | 0.32                   | 0.37                    | 58.00                    | 58.00                     |
| ESCA*  | 182           | 0.06   | 0.81                   | 0.72                    | 60.00                    | 55.00                     |
| LUAD   | 491           | 0.08   | 0.48                   | 0.35                    | 28.00                    | 25.00                     |
| TGCT   | 133           | 0.09   | 0.95                   | 1.00                    | 25.00                    | 26.00                     |
| UCS*   | 56            | 0.09   | 0.75                   | 0.85                    | 20.00                    | 22.00                     |
| READ*  | 154           | 0.10   | 0.96                   | 0.93                    | 64.00                    | 51.00                     |
| LAML*  | 179           | 0.10   | 0.58                   | 0.45                    | 66.00                    | 22.00                     |
| PAAD   | 183           | 0.11   | 0.25                   | 0.26                    | 5.00                     | 3.00                      |
| KIRC   | 506           | 0.17   | 0.65                   | 0.59                    | 83.00                    | 64.00                     |
| BRCA   | 1066          | 0.22   | 0.83                   | 0.81                    | 129.00                   | 120.00                    |
| GBM    | 571           | 0.23   | 0.05                   | 0.08                    | 7.00                     | 12.00                     |
| CHOL*  | 36            | 0.39   | 0.76                   | 0.83                    | 13.00                    | 14.00                     |
| PRAD   | 489           | 0.45   | 0.99                   | 0.97                    | 40.00                    | 44.00                     |
| BLCA   | 405           | 0.46   | 0.40                   | 0.44                    | 21.00                    | 26.00                     |
| UVM*   | 80            | 0.50   | 0.93                   | 0.93                    | 38.00                    | 26.00                     |
| HNLC   | 516           | 0.56   | 0.51                   | 0.44                    | 27.00                    | 25.00                     |
| LUSC   | 481           | 0.57   | 0.46                   | 0.49                    | 36.00                    | 44.00                     |
| SKCM*  | 104           | 0.63   | 0.84                   | 0.93                    | 36.00                    | 34.00                     |
| MESO*  | 86            | 0.64   | 0.62                   | 0.75                    | 28.00                    | 28.00                     |
| LIHC   | 366           | 0.73   | 0.48                   | 0.50                    | 23.00                    | 18.00                     |
| CESC   | 294           | 0.77   | 0.68                   | 0.66                    | 20.00                    | 21.00                     |
| STAD   | 433           | 0.90   | 0.35                   | 0.43                    | 11.00                    | 7.00                      |
| DLBC*  | 48            | 0.93   | 0.96                   | 0.89                    | 23.00                    | 15.00                     |

<sup>a</sup>5-year overall survival probability in low SCIN group.

<sup>b</sup>5-year overall survival probability in high SCIN group.

<sup>c</sup>number of samples at risk in low SCIN group at 5th year.

<sup>d</sup>number of samples at risk in high SCIN group at 5th year.

\*1-year overall survival statistics was reported in these cancer types due to short survival.

**Table 3** Association between WCIN and disease specific survival across cancer types

| cohort | sample_number | pvalue | low_surv5 <sup>a</sup> | high_surv5 <sup>b</sup> | low_surv5_n <sup>c</sup> | high_surv5_n <sup>d</sup> |
|--------|---------------|--------|------------------------|-------------------------|--------------------------|---------------------------|
| UCEC   | 516           | 0.00   | 0.92                   | 0.74                    | 65.00                    | 42.00                     |
| LGG    | 501           | 0.00   | 0.76                   | 0.53                    | 36.00                    | 26.00                     |
| LIHC   | 357           | 0.01   | 0.63                   | 0.58                    | 24.00                    | 16.00                     |
| OV     | 524           | 0.01   | 0.42                   | 0.32                    | 59.00                    | 53.00                     |
| BRCA   | 1048          | 0.02   | 0.92                   | 0.86                    | 128.00                   | 112.00                    |
| UVM*   | 80            | 0.03   | 0.94                   | 0.92                    | 33.00                    | 31.00                     |
| DLBC   | 48            | 0.04   | 0.75                   | 1.00                    | 6.00                     | 3.00                      |
| SARC   | 247           | 0.05   | 0.65                   | 0.56                    | 28.00                    | 26.00                     |
| KIRP   | 278           | 0.06   | 0.89                   | 0.80                    | 31.00                    | 19.00                     |
| PCPG   | 161           | 0.06   | 1.00                   | 0.96                    | 16.00                    | 12.00                     |
| TGCT   | 133           | 0.08   | 1.00                   | 0.95                    | 28.00                    | 23.00                     |
| BLCA   | 391           | 0.13   | 0.51                   | 0.60                    | 24.00                    | 23.00                     |
| ACC    | 87            | 0.14   | 0.72                   | 0.58                    | 14.00                    | 14.00                     |
| HNSC   | 492           | 0.19   | 0.65                   | 0.59                    | 23.00                    | 26.00                     |
| THCA   | 491           | 0.21   | 0.98                   | 0.95                    | 50.00                    | 44.00                     |
| KIRC   | 495           | 0.23   | 0.74                   | 0.72                    | 65.00                    | 79.00                     |
| PRAD   | 488           | 0.26   | 1.00                   | 0.98                    | 35.00                    | 49.00                     |
| GBM    | 533           | 0.26   | 0.07                   | 0.06                    | 9.00                     | 8.00                      |
| THYM   | 122           | 0.32   | 1.00                   | 0.95                    | 18.00                    | 15.00                     |
| CESC   | 290           | 0.36   | 0.77                   | 0.70                    | 24.00                    | 16.00                     |
| STAD   | 406           | 0.37   | 0.53                   | 0.54                    | 10.00                    | 8.00                      |
| ESCA*  | 180           | 0.38   | 0.90                   | 0.79                    | 64.00                    | 49.00                     |
| LUSC   | 432           | 0.39   | 0.72                   | 0.65                    | 32.00                    | 36.00                     |
| CHOL*  | 35            | 0.39   | 0.75                   | 0.94                    | 12.00                    | 15.00                     |
| READ*  | 148           | 0.62   | 0.95                   | 0.99                    | 48.00                    | 62.00                     |
| KICH   | 65            | 0.72   | 0.89                   | 0.88                    | 17.00                    | 20.00                     |
| LUAD   | 456           | 0.78   | 0.59                   | 0.55                    | 25.00                    | 23.00                     |
| PAAD   | 176           | 0.82   | 0.20                   | 0.41                    | 3.00                     | 5.00                      |
| SKCM*  | 104           | 0.83   | 0.91                   | 0.94                    | 33.00                    | 37.00                     |
| UCS*   | 55            | 0.94   | 0.78                   | 0.81                    | 21.00                    | 20.00                     |
| COAD   | 410           | 0.94   | 0.76                   | 0.77                    | 23.00                    | 14.00                     |
| MESO*  | 66            | 0.95   | 0.74                   | 0.74                    | 20.00                    | 23.00                     |

<sup>a</sup>5-year disease specific survival probability in low WCIN group.

<sup>b</sup>5-year disease specific survival probability in high WCIN group.

<sup>c</sup>number of samples at risk in low WCIN group at 5th year.

<sup>d</sup>number of samples at risk in high WCIN group at 5th year.

\*1-year disease-specific survival statistics was reported in these cancer types due to short survival.

**Table 4 Association between SCIN and disease specific survival across cancer types**

| cohort | sample_number | pvalue | low_surv5 <sup>a</sup> | high_surv5 <sup>b</sup> | low_surv5_n <sup>c</sup> | high_surv5_n <sup>d</sup> |
|--------|---------------|--------|------------------------|-------------------------|--------------------------|---------------------------|
| UCEC   | 516           | 0.00   | 0.94                   | 0.69                    | 69.00                    | 38.00                     |
| THCA   | 491           | 0.00   | 0.99                   | 0.82                    | 84.00                    | 10.00                     |
| KIRP   | 278           | 0.00   | 0.97                   | 0.72                    | 27.00                    | 23.00                     |
| ACC    | 87            | 0.00   | 0.84                   | 0.41                    | 21.00                    | 7.00                      |
| SARC   | 247           | 0.00   | 0.69                   | 0.51                    | 30.00                    | 24.00                     |
| LGG    | 501           | 0.00   | 0.79                   | 0.52                    | 32.00                    | 30.00                     |
| OV     | 524           | 0.01   | 0.34                   | 0.41                    | 54.00                    | 58.00                     |
| KICH   | 65            | 0.01   | 1.00                   | 0.73                    | 23.00                    | 14.00                     |
| ESCA*  | 180           | 0.02   | 0.89                   | 0.81                    | 58.00                    | 55.00                     |
| READ*  | 148           | 0.04   | 1.00                   | 0.93                    | 64.00                    | 46.00                     |
| PCPG   | 161           | 0.05   | 1.00                   | 0.96                    | 15.00                    | 13.00                     |
| LUAD   | 456           | 0.06   | 0.64                   | 0.50                    | 26.00                    | 22.00                     |
| BRCA   | 1048          | 0.06   | 0.91                   | 0.87                    | 124.00                   | 116.00                    |
| COAD   | 410           | 0.08   | 0.81                   | 0.72                    | 21.00                    | 16.00                     |
| TGCT   | 133           | 0.11   | 0.95                   | 1.00                    | 25.00                    | 26.00                     |
| THYM   | 122           | 0.12   | 1.00                   | 0.91                    | 29.00                    | 4.00                      |
| PAAD   | 176           | 0.13   | 0.30                   | 0.32                    | 5.00                     | 3.00                      |
| KIRC   | 495           | 0.17   | 0.75                   | 0.70                    | 82.00                    | 62.00                     |
| UCS*   | 55            | 0.19   | 0.75                   | 0.84                    | 20.00                    | 21.00                     |
| PRAD   | 488           | 0.25   | 1.00                   | 0.98                    | 40.00                    | 44.00                     |
| LIHC   | 357           | 0.27   | 0.60                   | 0.61                    | 22.00                    | 18.00                     |
| CHOL*  | 35            | 0.34   | 0.81                   | 0.88                    | 13.00                    | 14.00                     |
| STAD   | 406           | 0.37   | 0.53                   | 0.55                    | 11.00                    | 7.00                      |
| GBM    | 533           | 0.44   | 0.06                   | 0.08                    | 7.00                     | 10.00                     |
| LUSC   | 432           | 0.53   | 0.72                   | 0.66                    | 29.00                    | 39.00                     |
| MESO*  | 66            | 0.54   | 0.71                   | 0.78                    | 24.00                    | 19.00                     |
| DLBC*  | 48            | 0.55   | 1.00                   | 0.94                    | 23.00                    | 15.00                     |
| UVM*   | 80            | 0.72   | 0.93                   | 0.93                    | 38.00                    | 26.00                     |
| SKCM*  | 104           | 0.89   | 0.92                   | 0.93                    | 36.00                    | 34.00                     |
| BLCA   | 391           | 0.91   | 0.59                   | 0.53                    | 21.00                    | 26.00                     |
| HNSC   | 492           | 0.94   | 0.63                   | 0.62                    | 25.00                    | 24.00                     |
| CESC   | 290           | 0.98   | 0.71                   | 0.75                    | 19.00                    | 21.00                     |

<sup>a</sup>5-year disease specific survival probability in low SCIN group.

<sup>b</sup>5-year disease specific survival probability in high SCIN group.

<sup>c</sup>number of samples at risk in low SCIN group at 5th year.

<sup>d</sup>number of samples at risk in high SCIN group at 5th year.

\*1-year disease-specific survival statistics was reported in these cancer types due to short survival.

**Table 5 Association between WCIN and disease free survival across cancer types**

| cohort | sample_number | pvalue | low_surv5 <sup>a</sup> | high_surv5 <sup>b</sup> | low_surv5_n <sup>c</sup> | high_surv5_n <sup>d</sup> |
|--------|---------------|--------|------------------------|-------------------------|--------------------------|---------------------------|
| UCEC   | 406           | 0.00   | 0.90                   | 0.72                    | 55.00                    | 28.00                     |
| OV     | 279           | 0.00   | 0.25                   | 0.10                    | 17.00                    | 8.00                      |
| PRAD   | 332           | 0.02   | 0.87                   | 0.78                    | 24.00                    | 27.00                     |
| LIHC   | 315           | 0.03   | 0.41                   | 0.22                    | 14.00                    | 4.00                      |
| COAD   | 175           | 0.05   | 0.83                   | 0.62                    | 11.00                    | 3.00                      |
| LGG*   | 130           | 0.06   | 0.97                   | 0.98                    | 61.00                    | 41.00                     |
| LUSC   | 295           | 0.08   | 0.73                   | 0.63                    | 24.00                    | 24.00                     |
| MESO*  | 15            | 0.08   | 0.67                   | 1.00                    | 6.00                     | 2.00                      |
| CESC   | 170           | 0.11   | 0.85                   | 0.76                    | 17.00                    | 9.00                      |
| KICH   | 29            | 0.16   | 0.91                   | 1.00                    | 5.00                     | 12.00                     |
| BRCA   | 927           | 0.25   | 0.86                   | 0.82                    | 105.00                   | 85.00                     |
| CHOL*  | 24            | 0.26   | 0.71                   | 0.50                    | 10.00                    | 4.00                      |
| DLBC   | 28            | 0.28   | 1.00                   | 0.92                    | 5.00                     | 3.00                      |
| UCS*   | 26            | 0.28   | 1.00                   | 0.77                    | 11.00                    | 9.00                      |
| PAAD*  | 68            | 0.35   | 0.86                   | 0.80                    | 21.00                    | 21.00                     |
| KIRC   | 107           | 0.38   | 0.92                   | 0.76                    | 19.00                    | 19.00                     |
| TGCT   | 104           | 0.39   | 0.68                   | 0.82                    | 9.00                     | 15.00                     |
| SARC   | 148           | 0.44   | 0.56                   | 0.45                    | 16.00                    | 11.00                     |
| GBM*   | 3             | 0.48   | 1.00                   | 1.00                    | 1.00                     | 2.00                      |
| KIRP   | 180           | 0.52   | 0.74                   | 0.89                    | 17.00                    | 14.00                     |
| READ*  | 42            | 0.53   | 0.90                   | 1.00                    | 15.00                    | 20.00                     |
| LUAD   | 291           | 0.59   | 0.63                   | 0.54                    | 19.00                    | 18.00                     |
| THCA   | 352           | 0.76   | 0.91                   | 0.90                    | 36.00                    | 33.00                     |
| ESCA*  | 87            | 0.80   | 0.75                   | 0.82                    | 28.00                    | 22.00                     |
| ACC    | 52            | 0.83   | 0.68                   | 0.72                    | 11.00                    | 10.00                     |
| BLCA   | 187           | 0.88   | 0.72                   | 0.71                    | 11.00                    | 15.00                     |
| HNSC   | 130           | 0.94   | 0.69                   | 0.54                    | 7.00                     | 4.00                      |
| STAD   | 255           | 0.96   | 0.59                   | 0.70                    | 7.00                     | 6.00                      |
| PCPG   | 144           | 0.97   | 0.95                   | 0.97                    | 12.00                    | 10.00                     |

<sup>a</sup>5-year disease free survival probability in low WCIN group.

<sup>b</sup>5-year disease free survival probability in high WCIN group.

<sup>c</sup>number of samples at risk in low WCIN group at 5th year.

<sup>d</sup>number of samples at risk in high WCIN group at 5th year.

\*1-year disease-free survival statistics was reported in these cancer types due to short survival.

**Table 6 Association between SCIN and disease free survival across cancer types**

| cohort | sample_number | pvalue | low_surv5 <sup>a</sup> | high_surv5 <sup>b</sup> | low_surv5_n <sup>c</sup> | high_surv5_n <sup>d</sup> |
|--------|---------------|--------|------------------------|-------------------------|--------------------------|---------------------------|
| UCEC   | 406           | 0.00   | 0.92                   | 0.65                    | 61.00                    | 22.00                     |
| ACC    | 52            | 0.00   | 0.81                   | 0.48                    | 16.00                    | 5.00                      |
| PRAD   | 332           | 0.00   | 0.88                   | 0.75                    | 27.00                    | 24.00                     |
| KIRP   | 180           | 0.02   | 0.88                   | 0.72                    | 18.00                    | 13.00                     |
| LUSC   | 295           | 0.03   | 0.71                   | 0.64                    | 25.00                    | 23.00                     |
| THCA   | 352           | 0.03   | 0.92                   | 0.81                    | 64.00                    | 5.00                      |
| KIRC   | 107           | 0.04   | 0.94                   | 0.70                    | 24.00                    | 14.00                     |
| READ*  | 42            | 0.09   | 1.00                   | 0.89                    | 20.00                    | 15.00                     |
| BRCA   | 927           | 0.10   | 0.88                   | 0.80                    | 100.00                   | 90.00                     |
| PAAD*  | 68            | 0.14   | 0.91                   | 0.74                    | 23.00                    | 19.00                     |
| LIHC   | 315           | 0.15   | 0.33                   | 0.31                    | 12.00                    | 6.00                      |
| GBM*   | 3             | 0.16   | 1.00                   | 1.00                    | 1.00                     | 2.00                      |
| KICH   | 29            | 0.18   | 0.94                   | 1.00                    | 11.00                    | 6.00                      |
| COAD   | 175           | 0.27   | 0.79                   | 0.71                    | 9.00                     | 5.00                      |
| CESC   | 170           | 0.30   | 0.86                   | 0.75                    | 15.00                    | 11.00                     |
| HNSC   | 130           | 0.31   | 0.66                   | 0.59                    | 8.00                     | 3.00                      |
| LUAD   | 291           | 0.37   | 0.63                   | 0.54                    | 19.00                    | 18.00                     |
| DLBC*  | 28            | 0.45   | 1.00                   | 1.00                    | 14.00                    | 11.00                     |
| MESO*  | 15            | 0.46   | 0.69                   | 1.00                    | 6.00                     | 2.00                      |
| ESCA*  | 87            | 0.49   | 0.80                   | 0.76                    | 26.00                    | 24.00                     |
| PCCPG  | 144           | 0.49   | 0.93                   | 1.00                    | 12.00                    | 10.00                     |
| LGG    | 130           | 0.61   | 0.76                   | 0.65                    | 3.00                     | 3.00                      |
| OV     | 279           | 0.64   | 0.22                   | 0.14                    | 17.00                    | 8.00                      |
| CHOL*  | 24            | 0.65   | 0.67                   | 0.57                    | 10.00                    | 4.00                      |
| BLCA   | 187           | 0.69   | 0.73                   | 0.69                    | 14.00                    | 12.00                     |
| TGCT   | 104           | 0.70   | 0.75                   | 0.75                    | 14.00                    | 10.00                     |
| STAD   | 255           | 0.76   | 0.67                   | 0.64                    | 8.00                     | 5.00                      |
| UCS*   | 26            | 0.76   | 0.92                   | 0.83                    | 10.00                    | 10.00                     |
| SARC   | 148           | 0.79   | 0.53                   | 0.48                    | 14.00                    | 13.00                     |

<sup>a</sup>5-year disease free survival probability in low SCIN group.

<sup>b</sup>5-year disease free survival probability in high SCIN group.

<sup>c</sup>number of samples at risk in low SCIN group at 5th year.

<sup>d</sup>number of samples at risk in high SCIN group at 5th year.

\*1-year disease-free survival statistics was reported in these cancer types due to short survival.

**Table 7 Association between WCIN and progression free survival across cancer types**

| Cohort | sample_number | pvalue | low_surv5 | high_surv5 | low_surv5_n | high_surv5_n |
|--------|---------------|--------|-----------|------------|-------------|--------------|
| UCEC   | 518           | 0.00   | 0.85      | 0.56       | 60.00       | 34.00        |
| LGG    | 509           | 0.00   | 0.55      | 0.28       | 26.00       | 10.00        |
| PRAD   | 489           | 0.00   | 0.75      | 0.66       | 27.00       | 36.00        |
| OV     | 558           | 0.00   | 0.18      | 0.08       | 24.00       | 11.00        |
| LIHC   | 366           | 0.00   | 0.35      | 0.19       | 13.00       | 5.00         |
| UVM*   | 79            | 0.01   | 0.94      | 0.69       | 31.00       | 24.00        |
| THYM   | 122           | 0.01   | 0.91      | 0.65       | 17.00       | 12.00        |
| SKCM*  | 104           | 0.03   | 0.78      | 0.64       | 28.00       | 24.00        |
| CHOL*  | 36            | 0.06   | 0.63      | 0.34       | 10.00       | 5.00         |
| KIRC   | 504           | 0.06   | 0.68      | 0.59       | 55.00       | 63.00        |
| CESC   | 294           | 0.06   | 0.71      | 0.62       | 22.00       | 14.00        |
| ESCA*  | 182           | 0.07   | 0.66      | 0.58       | 47.00       | 37.00        |
| ACC    | 89            | 0.08   | 0.50      | 0.39       | 11.00       | 10.00        |
| SARC   | 252           | 0.14   | 0.44      | 0.34       | 20.00       | 15.00        |
| HNSC   | 516           | 0.20   | 0.51      | 0.46       | 20.00       | 24.00        |
| BRCA   | 1066          | 0.22   | 0.80      | 0.76       | 119.00      | 102.00       |
| BLCA   | 406           | 0.29   | 0.38      | 0.44       | 19.00       | 17.00        |
| READ*  | 154           | 0.32   | 0.90      | 0.88       | 47.00       | 57.00        |
| GBM    | 571           | 0.33   | 0.04      | 0.02       | 5.00        | 3.00         |
| TGCT   | 133           | 0.43   | 0.69      | 0.80       | 17.00       | 20.00        |
| COAD   | 425           | 0.43   | 0.63      | 0.55       | 21.00       | 9.00         |
| DLBC   | 48            | 0.43   | 0.70      | 0.77       | 6.00        | 3.00         |
| KIRP   | 281           | 0.48   | 0.72      | 0.79       | 28.00       | 17.00        |
| LUSC   | 482           | 0.53   | 0.55      | 0.54       | 31.00       | 34.00        |
| LUAD   | 491           | 0.68   | 0.39      | 0.39       | 20.00       | 18.00        |
| THCA   | 497           | 0.74   | 0.85      | 0.83       | 42.00       | 40.00        |
| KICH   | 65            | 0.75   | 0.87      | 0.87       | 17.00       | 20.00        |
| STAD   | 435           | 0.82   | 0.40      | 0.48       | 10.00       | 8.00         |
| PCPG   | 161           | 0.83   | 0.80      | 0.87       | 11.00       | 11.00        |
| PAAD*  | 183           | 0.85   | 0.62      | 0.64       | 42.00       | 50.00        |
| UCS*   | 56            | 0.92   | 0.50      | 0.58       | 14.00       | 14.00        |
| MESO*  | 84            | 0.97   | 0.59      | 0.52       | 22.00       | 19.00        |

<sup>a</sup>5-year progression free survival probability in low WCIN group.

<sup>b</sup>5-year progression free survival probability in high WCIN group.

<sup>c</sup>number of samples at risk in low WCIN group at 5th year.

<sup>d</sup>number of samples at risk in high WCIN group at 5th year.

\*1-year progression-free survival statistics was reported in these cancer types due to short survival.



**Table 8 Association between SCIN and progression free survival across cancer types**

| cohort | sample_number | pvalue | low_surv5 <sup>a</sup> | high_surv5 <sup>b</sup> | low_surv5_n <sup>c</sup> | high_surv5_n <sup>d</sup> |
|--------|---------------|--------|------------------------|-------------------------|--------------------------|---------------------------|
| UCEC   | 518           | 0.00   | 0.86                   | 0.50                    | 65.00                    | 29.00                     |
| ACC    | 89            | 0.00   | 0.66                   | 0.22                    | 16.00                    | 5.00                      |
| KIRP   | 281           | 0.00   | 0.86                   | 0.61                    | 27.00                    | 18.00                     |
| THCA   | 497           | 0.00   | 0.87                   | 0.64                    | 75.00                    | 7.00                      |
| PRAD   | 489           | 0.00   | 0.76                   | 0.65                    | 32.00                    | 31.00                     |
| LGG    | 509           | 0.00   | 0.50                   | 0.33                    | 18.00                    | 18.00                     |
| CHOL*  | 36            | 0.02   | 0.69                   | 0.27                    | 11.00                    | 4.00                      |
| THYM   | 122           | 0.03   | 0.85                   | 0.60                    | 26.00                    | 3.00                      |
| GBM*   | 571           | 0.06   | 0.29                   | 0.32                    | 73.00                    | 70.00                     |
| COAD   | 425           | 0.07   | 0.65                   | 0.53                    | 19.00                    | 11.00                     |
| SARC   | 252           | 0.08   | 0.44                   | 0.34                    | 19.00                    | 16.00                     |
| PAAD*  | 183           | 0.09   | 0.67                   | 0.59                    | 46.00                    | 46.00                     |
| KICH   | 65            | 0.09   | 0.97                   | 0.72                    | 23.00                    | 14.00                     |
| KIRC   | 504           | 0.11   | 0.66                   | 0.60                    | 67.00                    | 51.00                     |
| ESCA*  | 182           | 0.12   | 0.61                   | 0.63                    | 41.00                    | 43.00                     |
| LIHC   | 366           | 0.12   | 0.26                   | 0.27                    | 11.00                    | 7.00                      |
| BRCA   | 1066          | 0.12   | 0.81                   | 0.75                    | 118.00                   | 103.00                    |
| READ*  | 154           | 0.12   | 0.93                   | 0.84                    | 59.00                    | 45.00                     |
| UVM*   | 79            | 0.21   | 0.82                   | 0.80                    | 32.00                    | 23.00                     |
| OV     | 558           | 0.25   | 0.14                   | 0.13                    | 22.00                    | 13.00                     |
| BLCA   | 406           | 0.31   | 0.44                   | 0.39                    | 16.00                    | 20.00                     |
| SKCM*  | 104           | 0.31   | 0.74                   | 0.67                    | 28.00                    | 24.00                     |
| LUAD   | 491           | 0.35   | 0.40                   | 0.38                    | 19.00                    | 19.00                     |
| UCS*   | 56            | 0.41   | 0.54                   | 0.54                    | 14.00                    | 14.00                     |
| CESC   | 294           | 0.41   | 0.70                   | 0.63                    | 19.00                    | 17.00                     |
| STAD   | 435           | 0.41   | 0.45                   | 0.44                    | 11.00                    | 7.00                      |
| PCPG   | 161           | 0.45   | 0.84                   | 0.84                    | 13.00                    | 9.00                      |
| DLBC*  | 48            | 0.51   | 0.83                   | 0.84                    | 19.00                    | 15.00                     |
| MESO*  | 84            | 0.73   | 0.63                   | 0.47                    | 24.00                    | 17.00                     |
| TGCT   | 133           | 0.77   | 0.72                   | 0.77                    | 19.00                    | 18.00                     |
| LUSC   | 482           | 0.79   | 0.51                   | 0.57                    | 29.00                    | 36.00                     |
| HNSC   | 516           | 0.93   | 0.49                   | 0.49                    | 23.00                    | 21.00                     |

<sup>a</sup>5-year progression free survival probability in low SCIN group.

<sup>b</sup>5-year progression free survival probability in high SCIN group.

<sup>c</sup>number of samples at risk in low SCIN group at 5th year.

<sup>d</sup>number of samples at risk in high SCIN group at 5th year.

\*1-year progression-free survival statistics was reported in these cancer types due to short survival.

## Supplemental Figures

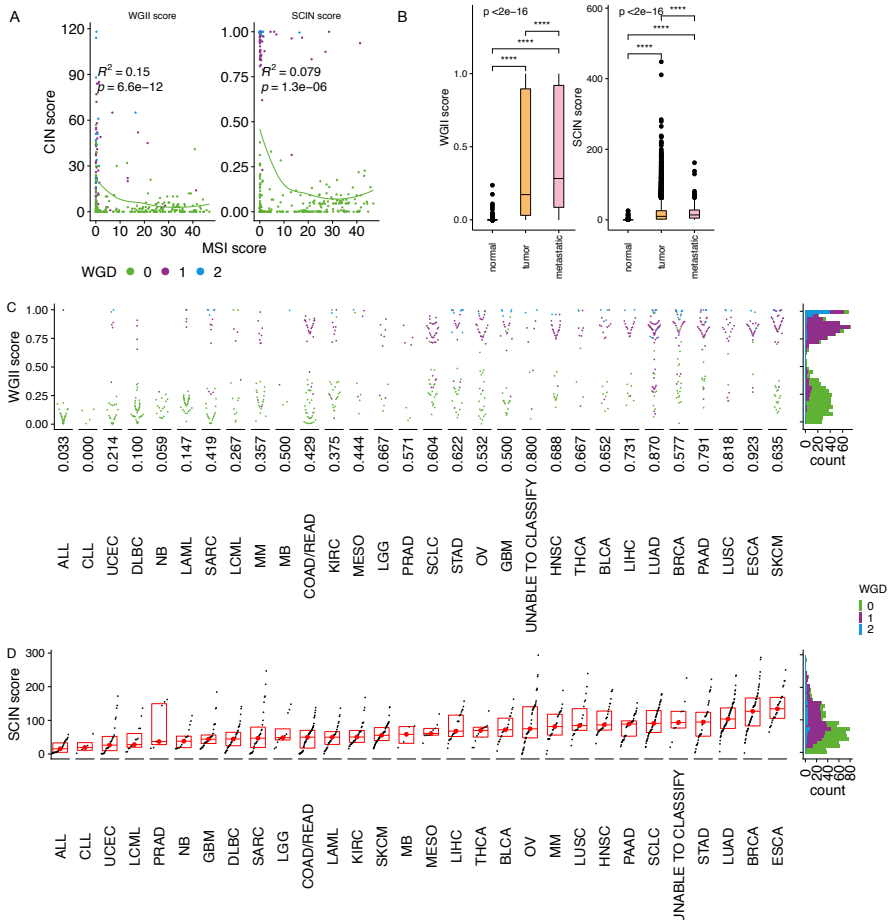

**Fig. 1** **(A)** Comparison of the WGI and the SCIN score between samples from normal tissue with primary and metastatic samples. significant differences between high and low WGI were observed. **(B)** The relationship between microsatellite instability (MSI) scores and the the WGI and the SCIN score. **(C)** Cancer-type-wise WGI score distribution in CCLE cell lines, cancer types are ordered by the median WGI scores; whole genome doubling (WGD) status is encoded by colours. The number reported on x axis is the proportion of samples that underwent WGD. **(D)** SCIN score distribution in CCLE cell lines, cancer types are ordered by their median SCIN scores

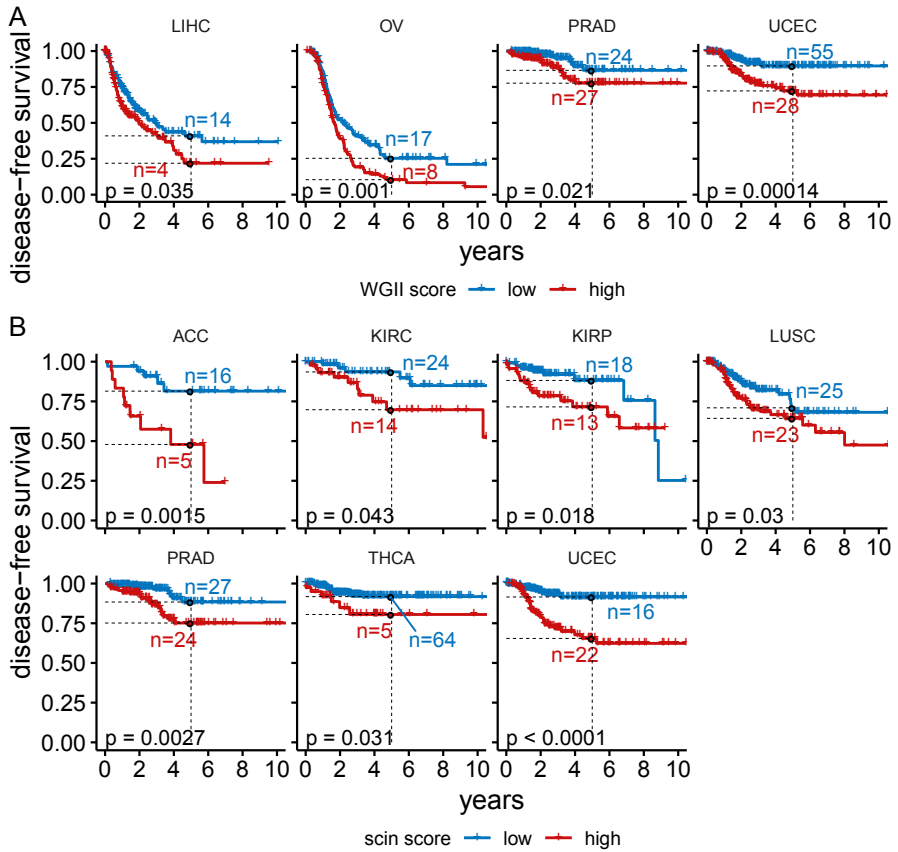

**Fig. 2** (A) Disease free survival in four cancer types where significant differences between high and low WGII were observed. (B) Disease free survival in four cancer types where significant differences between high and low SCIN scores were observed.

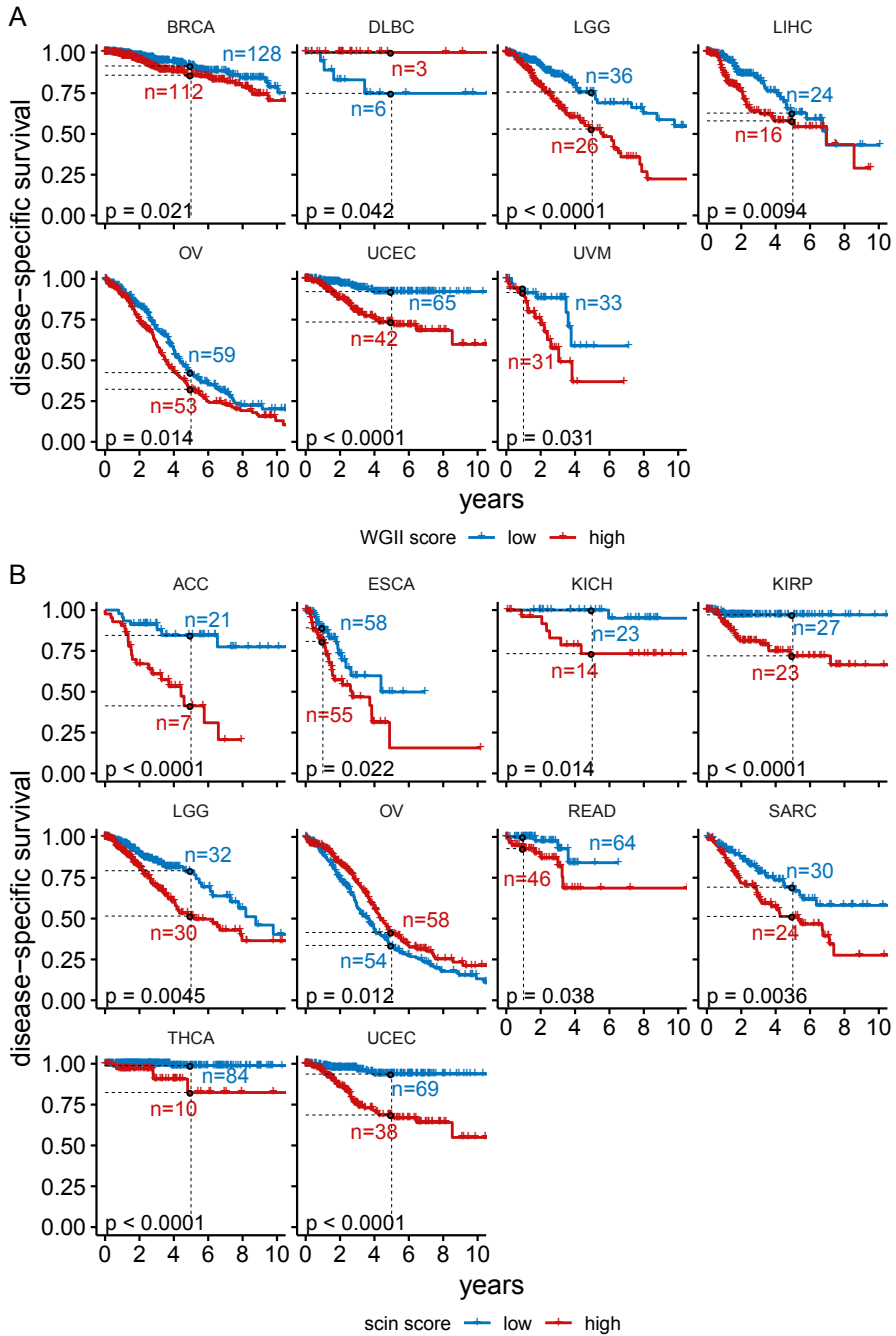

**Fig. 3** (A) Disease specific survival in seven cancer types where significant differences between high and low WGII were observed. (B) Disease specific survival where significant differences between high and low SCIN score were observed.

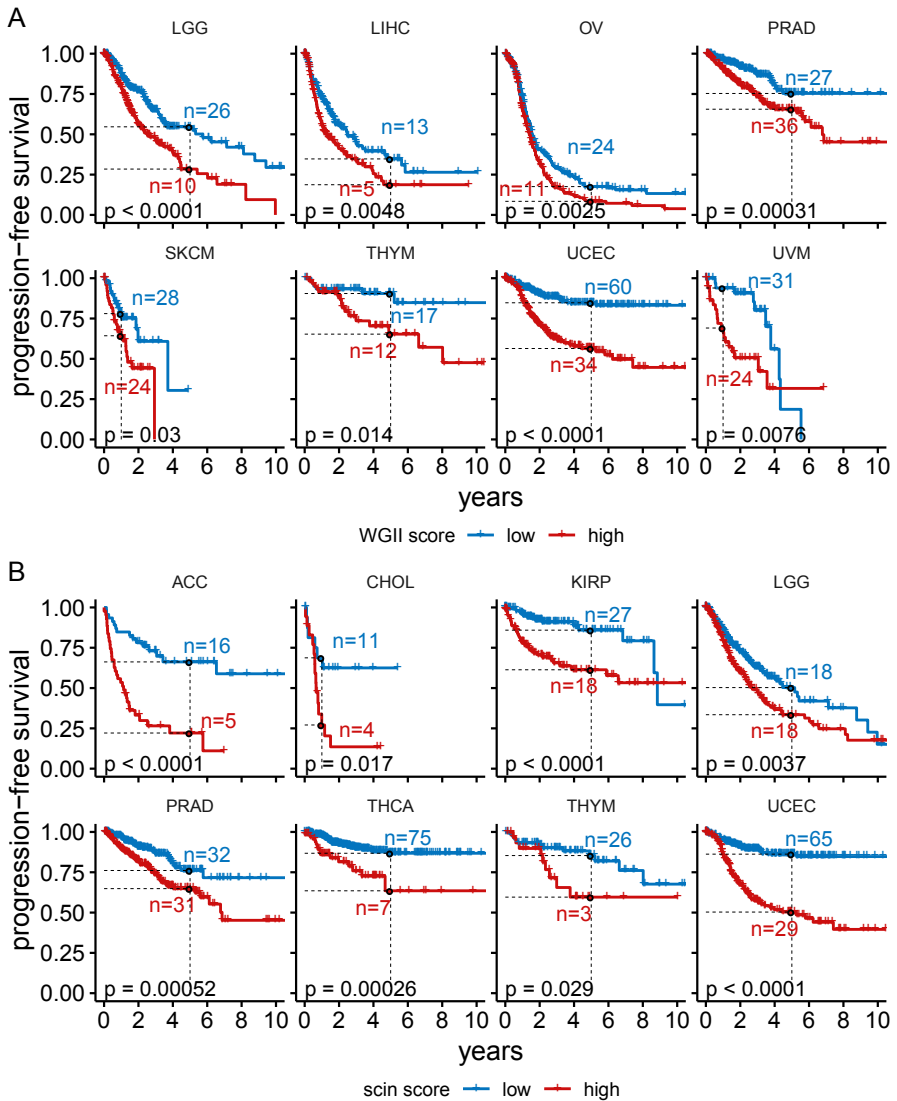

**Fig. 4** (A) Progression free survival in eight cancer types where significant differences between high and low WGII were observed. (B) Progression free survival where significant differences between high and low SCIN scores were observed.

14 *Supplemental Tables and Figures*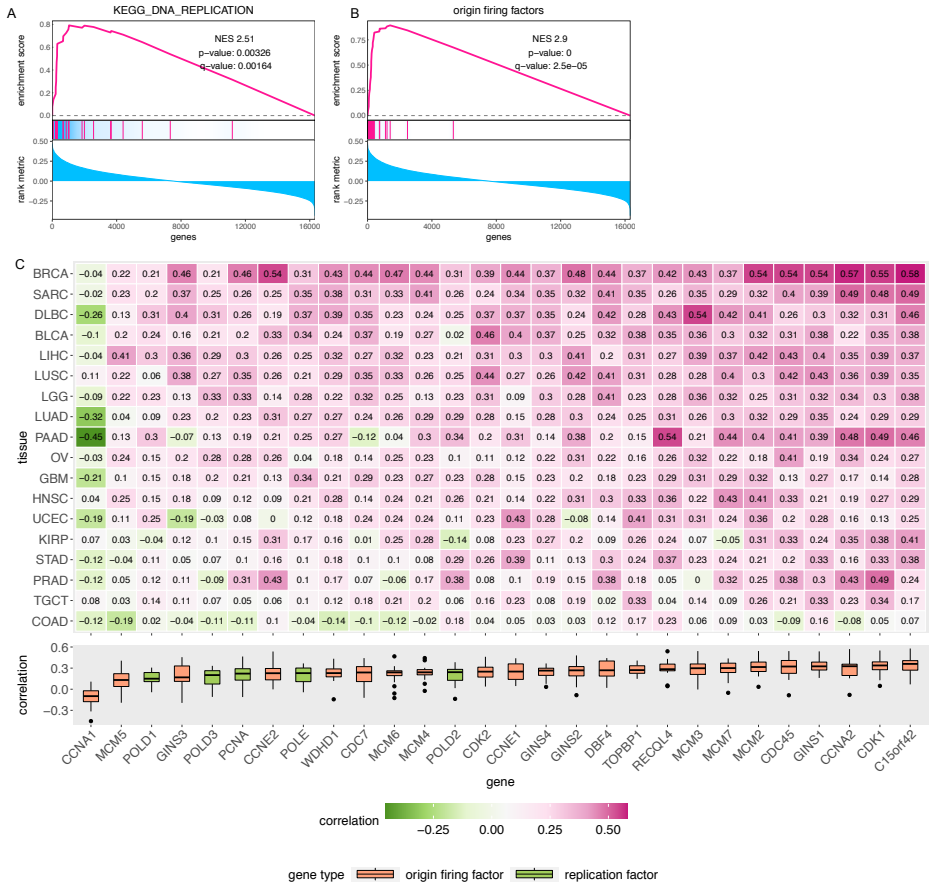

**Fig. 5** (A) Gene set enrichment analysis (GSEA) for KEGG DNA replication gene set. All genes were ordered according to the correlation of their expression with the SCIN score and enrichment of the replication gene set was tested using resampling. (B) GSEA analysis for manually curated origin firing factor gene set. (C) Gene expression of many origin firing factors is positively correlated with SCIN scores in many cancer types. Rows and columns of the heatmap represent cancer types and origin firing factor genes, respectively. Cancer types are clustered based on their correlation coefficients with origin firing factors. Genes are ordered based on the median correlation coefficient. Colour and values encoded in the heatmap represent the Spearman correlation coefficient.

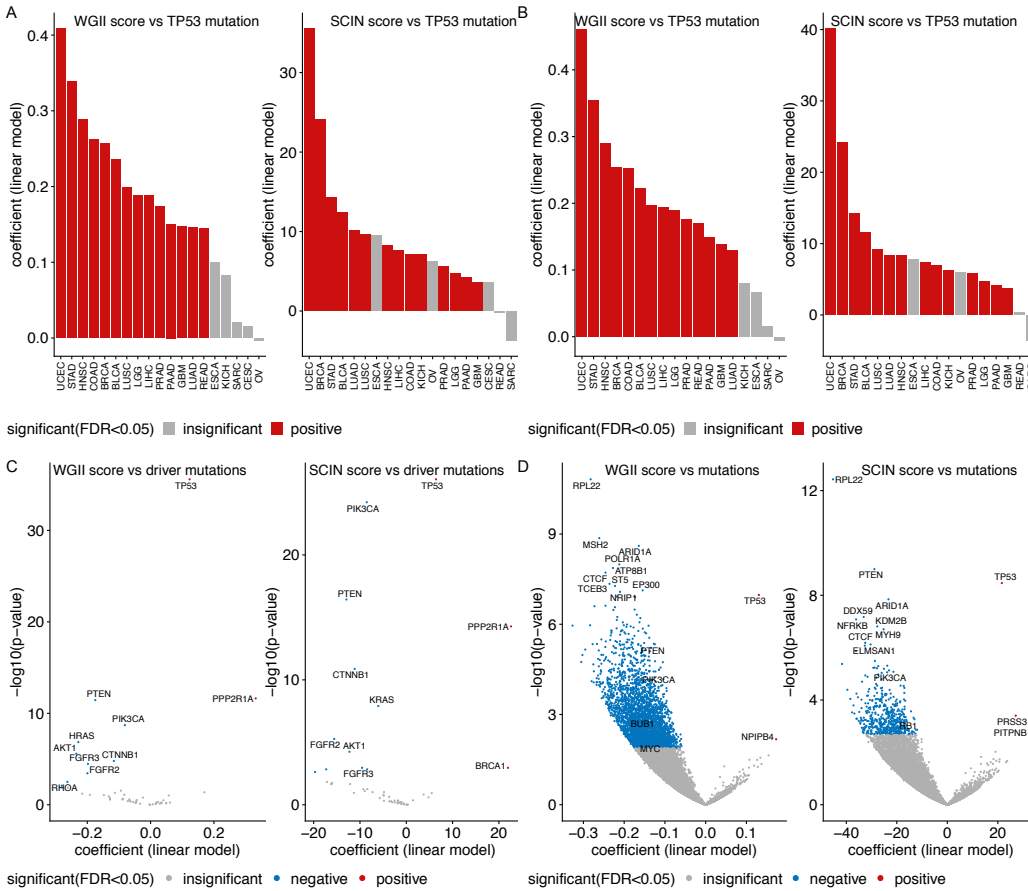

**Fig. 6** (A) TP53 mutation is positively associated with high SCIN in multiple cancer types. The bar shows the linear regression model coefficient using SCIN score as dependent variable and TP53 mutation as explanatory variable. Only cancer types with both TP53 mutant and TP53 wild type in more than 20 samples are considered. (B) TP53 mutation is positively associated with SCIN score, the association analysis is performed as in (A), except excluding microsatellite instable (MSI) samples. (C) The volcano plot shows the association between CIN and validated driver mutations, association analysis is performed using non-MSI samples only. (D) The volcano plot shows the correlation between CIN score and somatic mutation in CCLE cell line samples. For all association in (A)-(D), red, grey and blue colors encode positive, insignificant and negative associations.  $FDR > 0.05$  is considered as insignificant. Gene names of known important oncogenes and CIN driver genes are annotated in the volcano plot, if significantly associated with CIN.
